# Supplementary material
Source: PubMed Central journal article supplement (PMC544486)
Supplement: plntcell_tpc.104.027359_1.pdf [file plntcell_tpc.104.027359_1.pdf]

**Supplemental Table 1.** Independent inheritance of the components apospory and parthenogenesis within various F<sub>1</sub> families originating from crossing of obligate sexual plants with apomictic cultivars or with F<sub>1</sub> plants (results from FCSS with 2 x 30 bulked seeds)

| F <sub>1</sub> Family <sup>1)</sup>    | Plants with mode of reproduction <sup>2)</sup> |                |                 |              |                  |                  |                  | Total plants |
|----------------------------------------|------------------------------------------------|----------------|-----------------|--------------|------------------|------------------|------------------|--------------|
|                                        | a- / p-                                        | a+ / p+        | a+ / p-         | a- / p+      | a(+)/ p-         | a- / p(+)        | a(+)/ p(+)       |              |
| 1(S1 x A15)                            | 8                                              | 0              | 2               | 0            | 9                | 3                | 6                | 28           |
| 2(S1 x A17)                            | 12                                             | 3              | 5               | 0            | 14               | 2                | 22               | 58           |
| 3(S1 x A24)                            | 3                                              | 0              | 0               | 0            | 1                | 1                | 1                | 6            |
| 4(S1 x A25)                            | 8                                              | 0              | 0               | 0            | 0                | 6                | 5                | 19           |
| 1(S2 x A15)                            | 6                                              | 0              | 0               | 0            | 2                | 3                | 3                | 14           |
| 2(S3 x A15)                            | 2                                              | 0              | 0               | 0            | 2                | 3                | 1                | 8            |
| 3(S3 x A17)                            | 4                                              | 0              | 0               | 0            | 1                | 3                | 7                | 15           |
| 4(S3 x A21)                            | 1                                              | 0              | 0               | 0            | ?                | 2                | 13               | 16           |
| 5(S3 x A25)                            | 5                                              | 0              | 0               | 0            | 4                | 8                | 9                | 26           |
| 6(S3 x F <sub>1</sub> 1)               | 10                                             | 0              | 2               | 0            | 8                | 1                | 5                | 26           |
| 1(S4 x A25)                            | 4                                              | 0              | 0               | 0            | 5                | 8                | 6                | 23           |
| 1(SJ x A24)                            | 7                                              | 0              | 0               | 0            | 0                | 3                | 5                | 15           |
| 1(F <sub>1</sub> 1 x A32)              | 3                                              | 0              | 0               | 0            | 1                | 5                | 4                | 13           |
| 2(F <sub>1</sub> 2 x F <sub>1</sub> 3) | 8                                              | 0              | 1               | 0            | 21               | 2                | 6                | 38           |
| 3(F <sub>1</sub> 3 x F <sub>1</sub> 2) | 13                                             | 0              | 1               | 0            | 2                | 1                | 4                | 21           |
| <b>Total (%)</b>                       | <b>94 (28.8)</b>                               | <b>3 (0.9)</b> | <b>12 (3.7)</b> | <b>0 (0)</b> | <b>69 (21.2)</b> | <b>51 (15.6)</b> | <b>97 (29.8)</b> | <b>326</b>   |

<sup>1)</sup> for characters of parents, compare Table 8 within the paper; <sup>2)</sup> -, + and (+): lacking, complete or incomplete expression of apospory (a) and parthenogenesis (p), respectively; a- / p- are obligate sexuals, a+ / p+ obligate and a(+)/ p(+) facultative apomicts.
