# Supplementary material
Source: PubMed Central journal article supplement (PMC544486)
Supplement: plntcell_tpc.104.027359_2.pdf [file plntcell_tpc.104.027359_2.pdf]

**Supplemental Table 2.** Ploidy, expressivity of apospory and parthenogenesis and assigned genotypes from F<sub>1</sub> plants of the family 2(S1 x A17) as the basis for the segregation analyses in the Tables 3, 4 and 5 within the paper (S1 is tetraploid and A17 octoploid)

| F <sub>1</sub> plants | Ploidy <sup>1)</sup> | Expressivity (%) |                 | Assigned genotypes <sup>2)</sup>                |
|-----------------------|----------------------|------------------|-----------------|-------------------------------------------------|
|                       |                      | apospory         | parthenogenesis |                                                 |
| 1                     | ~5x                  | 67               | 0               | <i>Ait - / Apv - / pit pit / Ppv - /</i>        |
| 2                     | 6x                   | 33               | 0               | <i>Ait - / Apv - / pit pit / Ppv - /</i>        |
| 3                     | <6x                  | 45               | 0               | <i>Ait - / Apv - / pit pit / Ppv - /</i>        |
| 4                     | 5x/6x                | 0                | 0               | <i>ait ait / Apv - / pit pit / Ppv - /</i>      |
| 5                     | <6x                  | 81               | 86              | <i>Ait - / apv apv / Pit - / ppv ppv</i><br>/   |
| 6                     | >6x                  | 88               | 0               | <i>Ait - / apv apv / pit pit / Ppv - /</i>      |
| 7                     | 6x                   | 13               | 36              | <i>ait ait / apv apv / Pit - / Ppv - /</i>      |
| 8                     | 5x/6x                | 0                | 0               | <i>ait ait / Apv - / pit pit / Ppv - /</i>      |
| 9                     | ~5x                  | 60               | 67              | <i>Ait - / Apv - / Pit - / Ppv - /</i>          |
| 10                    | ~8x                  | 0                | 41              | <i>ait ait / Apv - / Pit - / Ppv - /</i>        |
| 11                    | 6x                   | 0                | 0               | <i>ait ait / Apv - / pit pit / Ppv - /</i>      |
| 12                    | <6x                  | 36               | 0               | <i>Ait - / Apv - / pit pit / Ppv - /</i>        |
| 13                    | 6x                   | 0                | ~50             | <i>ait ait / Apv - / Pit - / Ppv - /</i>        |
| 14                    | 6x                   | 56               | 61              | <i>Ait - / Apv - / Pit - / Ppv - /</i>          |
| 15                    | <6x                  | 0                | 0               | <i>ait ait / Apv - / pit pit / Ppv - /</i>      |
| 16                    | ~5x                  | 0                | 0               | <i>ait ait / Apv - / pit pit / Ppv - /</i>      |
| 17                    | <5x                  | 7                | 0               | <i>ait ait / apv apv / pit pit / Ppv -</i><br>/ |
| 18                    | <6x                  | 8                | 0               | <i>ait ait / apv apv / pit pit / Ppv -</i><br>/ |
| 19                    | 5x/6x                | 100              | 100             | <i>Ait - / apv apv / Pit - / ppv ppv</i><br>/   |
| 20                    | 6x                   | 68               | 0               | <i>Ait - / Apv - / pit pit / Ppv - /</i>        |
| 21                    | <6x                  | 70               | 60              | <i>Ait - / Apv - / Pit - / Ppv - /</i>          |

|    |       |     |     |                                                          |
|----|-------|-----|-----|----------------------------------------------------------|
| 22 | <6x   | 62  | 54  | <i>Ait - / Apv - / Pit - / Ppv - /</i>                   |
| 23 | 5x/6x | 36  | 0   | <i>Ait - / Apv - / pit pit / Ppv - /</i>                 |
| 24 | 6x    | 56  | 0   | <i>Ait - / Apv - / pit pit / Ppv - /</i>                 |
| 25 | <6x   | 36  | 29  | <i>Ait - / Apv - / Pit - / Ppv - /</i>                   |
| 26 | <6x   | 85  | 0   | <i>Ait - / apv apv / pit pit / Ppv - /</i>               |
| 27 | ~5x   | 0   | 0   | <i>ait ait / Apv - / pit pit / Ppv - /</i>               |
| 28 | 5x/6x | 42  | 42  | <i>Ait - / Apv - / Pit - / Ppv - /</i>                   |
| 29 | 5x/6x | 0   | 0   | <i>ait ait / Apv - / pit pit / Ppv - /</i>               |
| 30 | 6x    | 94  | 0   | <i>Ait - / apv apv / pit pit / Ppv - /</i>               |
| 31 | ~5x   | ~50 | ~60 | <i>Ait - / Apv - / Pit - / Ppv - /</i>                   |
| 32 | <6x   | 0   | 0   | <i>ait ait / Apv - / pit pit / Ppv - /</i>               |
| 33 | ~5x   | 17  | 0   | <i>ait ait / apv apv / pit pit / Ppv - /</i><br><i>/</i> |
| 34 | ~5x   | 12  | 54  | <i>ait ait / apv apv / Pit - / Ppv - /</i>               |
| 35 | ~5x   | 16  | 36  | <i>ait ait / apv apv / Pit - / Ppv - /</i>               |
| 36 | ~5x   | 96  | 0   | <i>Ait - / apv apv / pit pit / Ppv - /</i>               |
| 37 | ~5x   | 36  | 0   | <i>Ait - / Apv - / pit pit / Ppv - /</i>                 |
| 38 | ~5x   | 58  | 58  | <i>Ait - / Apv - / Pit - / Ppv - /</i>                   |
| 39 | 5x/6x | 47  | 34  | <i>Ait - / Apv - / Pit - / Ppv - /</i>                   |
| 40 | 5x/6x | 58  | 65  | <i>Ait - / Apv - / Pit - / Ppv - /</i>                   |
| 41 | 5x/6x | 0   | 0   | <i>ait ait / Apv - / pit pit / Ppv - /</i>               |
| 42 | 5x/6x | 0   | 0   | <i>ait ait / Apv - / pit pit / Ppv - /</i>               |
| 43 | ~6x   | 66  | 64  | <i>Ait - / Apv - / Pit - / Ppv - /</i>                   |
| 44 | 5x/6x | 0   | 0   | <i>ait ait - / Apv - / pit pit / Ppv - /</i>             |
| 45 | 5x/6x | 58  | 52  | <i>Ait - / Apv - / Pit - / Ppv - /</i>                   |
| 46 | 5x/6x | 61  | 61  | <i>Ait - / Apv - / Pit - / Ppv - /</i>                   |
| 47 | 5x/6x | 40  | 0   | <i>Ait - / Apv - / pit pit / Ppv - /</i>                 |
| 48 | 5x/6x | 70  | 61  | <i>Ait - / Apv - / Pit - / Ppv - /</i>                   |
| 49 | 5x/6x | 68  | 68  | <i>Ait - / Apv - / Pit - / Ppv - /</i>                   |
| 50 | >5x   | 10  | 30  | <i>ait ait / apv apv / Pit - / Ppv - /</i>               |
| 51 | 5x/6x | 0   | 0   | <i>ait ait / Apv - / pit pit / Ppv - /</i>               |

|    |       |     |    |                                            |
|----|-------|-----|----|--------------------------------------------|
| 52 | 5x/6x | 67  | 67 | <i>Ait - / Apv - / Pit - / Ppv - /</i>     |
| 53 | 6x    | 58  | 51 | <i>Ait - / Apv - / Pit - / Ppv - /</i>     |
| 54 | 5x/6x | 84  | 0  | <i>Ait - / apv apv / pit pit / Ppv - /</i> |
| 55 | 5x/6x | 40  | 32 | <i>Ait - / Apv - / Pit - / Ppv - /</i>     |
| 56 | 5x/6x | 28  | 0  | <i>Ait - / Apv - / pit pit / Ppv - /</i>   |
| 57 | 5x/6x | >20 | 0  | <i>Ait - / Apv - / pit pit / Ppv - /</i>   |
| 58 | 6x    | 66  | 62 | <i>Ait - / Apv - / Pit - / Ppv - /</i>     |

---

<sup>1)</sup> varying ploidy may results from reduced or unreduced or aneuploid gametes of the female and/or male parent;

<sup>2)</sup> only the diploid status is notified to discriminate between dominant and recessive constitution, dominant alleles (big letters) may be in simplex, duplex or higher constitution, two recessive alleles (small letters) mean homozygosity for the real ploidy constitution.
