# Supplementary material
Source: PubMed Central journal article supplement (PMC544486)
Supplement: plntcell_tpc.104.027359_4.pdf [file plntcell_tpc.104.027359_4.pdf]

**Supplemental Table 4.** Expected ratios of the dominant : recessive alleles in the gametes and sporophytes under consideration of the ploidy and a simplex, duplex and triplex constitution of the dominant alleles in the parents (in the cases of crossing parents with different ploidy and/or different dosages of dominant alleles the expected ratio has to be calculated from the gamete ratios) (modified from Haldane 1930)

|                        | <b>4x</b> | <b>6x</b> | <b>8x</b> | <b>10x</b> |
|------------------------|-----------|-----------|-----------|------------|
| <b><u>simplex</u></b>  | 1Ai 3ai   | 1Ai 5ai   | 1Ai 7ai   | 1Ai 9ai    |
| Gametes:               | 1 : 1     | 1 : 1     | 1 : 1     | 1 : 1      |
| S <sub>1</sub> plants: | 3 : 1     | 3 : 1     | 3 : 1     | 3 : 1      |
| <b><u>duplex</u></b>   | 2Ai 2ai   | 2Ai 4ai   | 2Ai 6ai   | 2Ai 8ai    |
| Gametes:               | 5 : 1     | 4 : 1     | 11 : 3    | 7 : 2      |
| S <sub>1</sub> plants: | 35 : 1    | 24 : 1    | 187 : 9   | 77 : 4     |
| <b><u>triplex</u></b>  | 3Ai 1ai   | 3Ai 3ai   | 3Ai 5ai   | 3Ai 7ai    |
| Gametes:               | ∞ : 0     | 19 : 1    | 13 : 1    | 11 : 1     |
| S <sub>1</sub> plants: | ∞ : 0     | 399 : 1   | 195 : 1   | 143 : 1    |
