# Supplementary material
Source: PubMed Central journal article supplement (PMC544486)
Supplement: plntcell_tpc.104.027359_5.pdf [file plntcell_tpc.104.027359_5.pdf]

**Supplemental Table 5.** Discrimination of reproductive pathways for dissection of the apomixis complex

| Pathway | Flow cytometric seed screen:<br>C-values of embryo + (endosperm) <sup>1)</sup>        | Component <sup>2)</sup> |        | Mode of reproduction <sup>3)</sup><br>(resulting embryos / origin)                                                                                                         |
|---------|---------------------------------------------------------------------------------------|-------------------------|--------|----------------------------------------------------------------------------------------------------------------------------------------------------------------------------|
|         |                                                                                       | apos.                   | parth. |                                                                                                                                                                            |
| 1       | bs: 2C + (3C)<br>ss: 2C + (3C)                                                        | -                       | -      | Obligate sexual<br>(B <sub>II</sub> / n + n)                                                                                                                               |
| 2       | bs: 2C + (5C)<br>ss: 2C + (5C)                                                        | +                       | +      | Obligate apomictic<br>(M <sub>II</sub> / 2n + 0)                                                                                                                           |
| 3       | bs: 3C + (5C)<br>ss: 3C + (5C)                                                        | +                       | -      | Obligate unreduced fertilized<br>(B <sub>III</sub> / 2n + n)                                                                                                               |
| 4       | bs: 1C + (3C)<br>ss: 1C + (3C)                                                        | -                       | +      | Obligate reduced parthenogenetic<br>(M <sub>I</sub> / n + 0)                                                                                                               |
| 5       | bs: 2C + (3C) + (5C)<br>ss: 2C + (3C), 2C + (5C); ratio ?                             | (+)                     | (+)    | Facultative apomictic and sexual<br>(M <sub>II</sub> and B <sub>II</sub> / 2n + 0 and n + n)                                                                               |
| 6       | bs: 2C + 3C + (5C)<br>ss: 2C + (3C), 3C + (5C); ratio ?                               | (+)                     | -      | Facultative sexual and unreduced fertilized<br>(B <sub>II</sub> and B <sub>III</sub> / n + n and 2n + n)                                                                   |
| 7       | bs: 2C + 3C + (5C)<br>ss: 2C + (5C), 3C + (5C); ratio ?                               | +                       | (+)    | Facultative apomictic and unreduced fertiliz. (M <sub>II</sub> and B <sub>III</sub> / n + n and 2n + n)                                                                    |
| 8       | bs: 2C + 3C + (5C)<br>ss: 2C+(3C), 2C+(5C), 3C+(5C);ratio?                            | (+)                     | (+)    | Facult. apomict., sexual and unred. fertiliz.<br>(M <sub>II</sub> , B <sub>II</sub> and B <sub>III</sub> / n + 0, n + n and 2n + n)                                        |
| 9       | bs: 1C + 2C + (3C)<br>ss: 1C + (3C), 2C + (3C); ratio ?                               | -                       | (+)    | Facultative sexual and reduced parthenog.<br>(B <sub>II</sub> and M <sub>I</sub> / n + n and n + 0)                                                                        |
| 10      | bs: 1C + 2C + (3C) + (5C)<br>ss: 1C + (3C), 2C + (5C); ratio ?                        | (+)                     | +      | Facultat. apomict. and reduced parthenog.<br>(M <sub>II</sub> and M <sub>I</sub> / 2n + 0 and n + 0)                                                                       |
| 11      | bs: 1C + 2C + (3C) + (5C)<br>ss: 1C+(3C), 2C+(3C), 2C+(5C);ratio?                     | (+)                     | (+)    | Facult. apomict., sexual and red. parthen.<br>(M <sub>II</sub> , B <sub>II</sub> and M <sub>I</sub> / 2n + 0, n + n and n + 0)                                             |
| 12      | bs: 1C + 2C + 3C + (5C)<br>ss:1C+(3C), 2C+(5C), 3C+(5C); ratio?                       | +                       | (+)    | Facult. apomict., red. parthen. and unred. fertiliz.(M <sub>II</sub> , M <sub>I</sub> , B <sub>III</sub> / 2n + 0, n + 0, 2n + n)                                          |
| 13      | bs: 1C + 2C + 3C + (5C)<br>ss: 1C + (3C), 2C + (3C), 2C + (5C),<br>3C + (5C); ratio ? | (+)                     | (+)    | Facult. apomict., sexual, red. parthenog. and unred. fertiliz. (M <sub>II</sub> , B <sub>II</sub> , M <sub>I</sub> and B <sub>III</sub> / 2n + 0, n + n, n + 0 and 2n + n) |

<sup>1)</sup> C-values are not identically with the real ploidy; <sup>2)</sup> + and -: obligate present or absent, (+) and (-): partial present or absent; <sup>3)</sup> B<sub>II</sub>, B<sub>III</sub>, M<sub>I</sub> and M<sub>II</sub>: hybrid from fertilization of reduced egg cell with reduced pollen, hybrid from fertilization of unreduced egg cell with reduced pollen, maternal plant from autonomous development of reduced egg cell and maternal plant from

autonomous development of unreduced egg cell, respectively (adapted and expanded nomenclature system from Rutishauser 1948).
